# Supplementary material for: Mutation based treatment recommendations from next generation sequencing data: a comparison of web tools
Source: PubMed Central journal article supplement (PMC5008344; doi:10.18632/oncotarget.8017), 2016-03-09
Supplement: oncotarget-07-22064-s001.pdf [file oncotarget-07-22064-s001.pdf]

## Mutation based treatment recommendations from next generation sequencing data: a comparison of web tools

### Supplementary Materials

**Supplementary Table S1: Lists the specific abnormalities for each cases and the location of the biopsy**

| Specimen # | Biopsy Site | Gene   | Variant           |
|------------|-------------|--------|-------------------|
| 1          | lymph node  | PTEN   | loss exons 2-9    |
|            |             | TET2   | T1114fs*16        |
|            |             | TP53   | R209fs*6          |
|            |             | CDH1   | K268fs*1          |
|            |             | RAD50  | S181fs*7          |
| 2          | liver       | ERBB2  | V777L, V842I      |
|            |             | ERBB3  | E928G             |
|            |             | CDH1   | T522fs*35         |
| 3          | skin        | PIK3R1 | A331fs*2          |
|            |             | STK11  | loss exon 1       |
|            |             | CCNE1  | amplification     |
|            |             | TP53   | R110P             |
| 4          | liver       | KRAS   | amplification     |
|            |             | CCND2  | amplification     |
|            |             | MDM2   | amplification     |
|            |             | MYC    | amplification     |
|            |             | TP53   | R273H             |
|            |             | MAP2K4 | loss              |
|            |             | FGF6   | amplification     |
|            |             | FGF23  | amplification     |
|            |             | KDM5A  | amplification     |
| 5          | lymph node  | PTEN   | truncation exon 1 |
|            |             | CCNE1  | amplification     |
|            |             | TP53   | E294*             |
| 6          | liver       | PIK3CA | H1047R            |
|            |             | FGFR1  | amplification     |
|            |             | TOP1   | amplification     |
|            |             | CDKN2A | loss              |
|            |             | CDKN2B | loss              |
|            |             | ARFRP1 | amplification     |
|            |             | ZNF703 | amplification     |
|            |             | ZNF217 | amplification     |
| 7          | liver       | PIK3CA | E542K             |
|            |             | CREBBP | Q513*             |

|       |               |        |                       |
|-------|---------------|--------|-----------------------|
|       |               | SPEN   | S659*                 |
| 8     | liver         | PTEN   | T319fs*1              |
|       |               | TP53   | H179Y                 |
|       |               | EPHB1  | amplification         |
|       |               | ESR1   | Y537C                 |
|       |               | ARFRP1 | amplification         |
|       |               | LRP1B  | splice site 3521-1G>T |
| 9     | lymph node    | TP53   | K120E                 |
|       |               | Notch1 | Y967*                 |
|       |               | CDH1   | loss                  |
| 10    | liver         | PIK3CA | H1047R                |
|       |               | PTEN   | T319fs*1              |
|       |               | MYCN   | amplification         |
|       |               | SOX2   | amplification         |
|       |               | CDKN2A | loss                  |
|       |               | CDKN2B | loss                  |
|       |               | TP53   | R175H                 |
|       |               | CCND1  | amplification         |
|       |               | APC    | truncation exon 9     |
|       |               | FGF19  | amplification         |
|       |               | FGF4   | amplification         |
|       |               | FGF3   | amplification         |
|       |               | CARD11 | S652L                 |
|       |               | 11     | head and neck         |
| FLT3  | amplification |        |                       |
| MDM2  | amplification |        |                       |
| CCND1 | amplification |        |                       |
| CCND2 | amplification |        |                       |
| TP53  | M246L         |        |                       |
| FGF19 | amplification |        |                       |
| FGF23 | amplification |        |                       |
| FGF3  | amplification |        |                       |
| FGF4  | amplification |        |                       |
| FGF6  | amplification |        |                       |
| GATA3 | G335fs*18     |        |                       |
| 12    | liver         | TOP1   | amplification         |
|       |               | CCND1  | amplification         |
|       |               | MYC    | amplification         |
|       |               | ESR1   | Y537S                 |
|       |               | ARID1A | S264*                 |
|       |               | FGF19  | amplification         |
|       |               | FGF4   | amplification         |
|       |               | FGF3   | amplification         |
| 13    | ovary         | RAD50  | L424fs*7              |
|       |               | PTEN   | N311fs*4              |
|       |               | TP53   | H179R                 |
|       |               | EMSY   | amplification         |

|    |             |        |                       |
|----|-------------|--------|-----------------------|
|    |             | MAP2K4 | loss                  |
| 14 | unknown     | ERBB2  | amplification         |
|    |             | PIK3CA | H1047R                |
|    |             | MAP2K2 | amplification         |
|    |             | MYC    | amplification         |
|    |             | TP53   | L348*                 |
|    |             | FGF14  | amplification         |
| 15 | liver       | ERBB2  | D769Y                 |
|    |             | PIK3CA | E453_D454del          |
|    |             | ESR1   | L536_Y537insN         |
|    |             | MAP3K1 | T829fs*10             |
| 16 | liver       | MYC    | amplification         |
|    |             | TP53   | slice site 783-1G>T   |
|    |             | RB1    | complex rearrangement |
|    |             | CREBBP | truncation            |
| 17 | liver       | PIK3CA | E545K                 |
|    |             | CCND1  | amplification         |
|    |             | ESR1   | Y537N                 |
|    |             | MDM4   | amplification         |
|    |             | FGF4   | amplification         |
|    |             | FGF19  | amplification         |
|    |             | FGF3   | amplification         |
| 18 | lymph node  | EGFR   | amplification         |
|    |             | CCND3  | amplification         |
|    |             | TP53   | R248W                 |
| 19 | liver       | RUNX1  | L225fs*12             |
|    |             | ARID1A | T2105fs*35            |
|    |             | BTK    | R492H                 |
|    |             | ESR1   | Y537S                 |
|    |             | ATRX   | splice                |
|    |             | MAP3K1 | R273fs*27, Q535fs*5   |
| 20 | soft tissue | PIK3CA | D1017H, G1049R        |
|    |             | CDK4   | amplification         |
|    |             | TP53   | S241fs*               |
|    |             | CDH1   | V458fs*5              |
| 21 | liver       | PIK3CA | amplification, E545K  |
|    |             | FGFR1  | amplification         |
|    |             | TP53   | P27fs*17              |
|    |             | ZNF703 | amplification         |
| 22 | lymph node  | CCND3  | amplification         |
|    |             | MYC    | amplification         |
|    |             | TP53   | Y220C                 |
|    |             | BCL2L2 | amplification         |
|    |             | JUN    | amplification         |
|    |             | MYST3  | amplification         |
| 23 | chest wall  | PIK3CA | H1047R                |
|    |             | ATM    | splice site 2921+1G>A |

|        |               |        |                             |
|--------|---------------|--------|-----------------------------|
|        |               | MAP3K1 | F1149fs*25, R1278fs*11      |
| 24     | skin          | AKT1   | amplification, E17K         |
|        |               | TP53   | Q136*                       |
| 25     | chest wall    | TSC2   | T849fs*24                   |
|        |               | TP53   | R306*                       |
|        |               | RARA   | RARA-LOC400931 fusion       |
| 26     | breast        | PIK3CA | amplification               |
|        |               | KIT    | amplification               |
|        |               | KDR    | amplification               |
|        |               | SOX2   | amplification               |
|        |               | IGF1R  | amplification               |
|        |               | CCND1  | amplification               |
|        |               | ATM    | E71*                        |
|        |               | TP53   | deletion exons 10-11, R156C |
|        |               | EPHB1  | amplification               |
|        |               | ESR1   | amplification               |
|        |               | MAP2K4 | W291*                       |
|        |               | GATA3  | S438fs*9+                   |
|        |               | LRP1B  | R2066fs*54                  |
|        |               | FGF19  | amplification               |
|        |               | FGF4   | amplification               |
|        |               | FGF3   | amplification               |
|        |               | ZNF217 | amplification               |
| MYST3  | amplification |        |                             |
| 27     | liver         | TP53   | R248Q                       |
|        |               | RAD50  | E1030_L1031>D*EL            |
| 28     | breast        | PIK3CA | H1047R                      |
|        |               | PTEN   | C71Y, loss                  |
|        |               | ERBB3  | E928G                       |
|        |               | FGFR2  | amplification               |
|        |               | BRCA2  | K3326*                      |
|        |               | SUFU   | deletion exons 9-11         |
|        |               | CCND1  | amplification               |
|        |               | FGF3   | amplification               |
|        |               | FGF4   | amplification               |
| 29     | liver         | FGF19  | amplification               |
|        |               | GNAS   | amplification               |
|        |               | IGF1R  | amplification               |
|        |               | MYC    | amplification               |
|        |               | ESR1   | Y537N                       |
|        |               | ARFRP1 | amplification               |
|        |               | GATA3  | S405fs*42+                  |
| ZNF217 | amplification |        |                             |
| 30     | soft tissue   | PIK3CA | E545K                       |
|        |               | TP53   | C141_V143del                |
|        |               | CDKN2A | loss                        |
|        |               | CDKN2B | loss                        |

|    |            |         |                                          |
|----|------------|---------|------------------------------------------|
|    |            | MCL1    | amplification                            |
|    |            | SMARCA4 | splice site<br>1119-1_1119insAGCCTGCGCAG |
|    |            | SPEN    | E103fs*27                                |
| 31 | liver      | PTEN    | R130G                                    |
|    |            | TOP1    | amplification                            |
|    |            | ESR1    | D538G                                    |
|    |            | MAP2K4  | loss                                     |
|    |            | GATA3   | I407fs*36+                               |
|    |            | ARFRP1  | amplification                            |
|    |            | ZNF217  | amplification                            |
|    |            |         |                                          |
| 32 | liver      | FGFR2   | truncation exon 17                       |
|    |            | MYC     | amplification                            |
|    |            | MDM2    | amplification                            |
|    |            | BRCA2   | V1681fs*7                                |
|    |            | MAP3K1  | loss                                     |
| 33 | breast     | FGFR1   | amplification                            |
|    |            | CCND1   | amplification                            |
|    |            | MYC     | amplification                            |
|    |            | EMSY    | amplification                            |
|    |            | FGF19   | amplification                            |
|    |            | FGF4    | amplification                            |
|    |            | FGF3    | amplification                            |
|    |            | ZNF703  | amplification                            |
| 34 | lymph node | ERBB2   | amplification                            |
|    |            | CDK12   | rearrangement, exon 14                   |
|    |            | MDM4    | amplification                            |
|    |            | PAX5    | TPM2-PAX5 fusion                         |
|    |            | ZNF217  | amplification                            |
| 35 | liver      | PIK3CA  | H1047R                                   |
|    |            | ATM     | E3022fs*37+                              |
|    |            | ESR1    | Y537S                                    |
| 36 | ovary      | PIK3CA  | E545K                                    |
|    |            | CDH1    | I650fs*13                                |
| 37 | peritoneum | KIT     | amplification                            |
|    |            | GNAS    | amplification                            |
|    |            | KRAS    | amplification                            |
|    |            | TOP1    | amplification                            |
|    |            | AURKA   | amplification                            |
|    |            | BRCA2   | T3033fs*29                               |
|    |            | JAK2    | E1097*                                   |
|    |            | SMAD4   | loss exons 2-4                           |
|    |            | TP53    | loss exons 8-9                           |
|    |            | ZNF217  | amplification                            |
| 38 | liver      | PIK3CA  | E545K                                    |
|    |            | CCND1   | amplification                            |
|    |            | MYC     | amplification                            |
|    |            | TP53    | R248G                                    |

|    |            |        |                       |
|----|------------|--------|-----------------------|
|    |            | EMSY   | amplification         |
|    |            | FGF19  | amplification         |
|    |            | FGF3   | amplification         |
|    |            | FGF4   | amplification         |
| 39 | liver      | PIK3CA | H1047R                |
|    |            | CCND1  | amplification         |
|    |            | CDH1   | D400Y                 |
|    |            | EMSY   | amplification         |
|    |            | FGF19  | amplification         |
|    |            | FGF3   | amplification         |
|    |            | FGF4   | amplification         |
|    |            | LRP1B  | R590fs*4              |
| 40 | lymph node | FGFR2  | K659E                 |
|    |            | CCND1  | amplification         |
|    |            | FGF19  | amplification         |
|    |            | FGF3   | amplification         |
|    |            | FGF4   | amplification         |
| 41 | liver      | STK11  | loss                  |
|    |            | CCNE1  | amplification         |
|    |            | MYC    | amplification         |
|    |            | TP53   | H297fs*48             |
| 42 | lung       | PTEN   | N323fs*2              |
|    |            | FGFR2  | amplification         |
|    |            | TOP1   | amplification         |
|    |            | ARFRP1 | amplification         |
|    |            | MAP2K4 | S240fs*29             |
|    |            | ZNF217 | amplification         |
| 43 | lymph node | AKT3   | amplification         |
|    |            | PDGFRB | amplification         |
|    |            | PIK3CA | H1047R                |
|    |            | FGFR4  | amplification         |
|    |            | FLT4   | amplification         |
|    |            | TOP1   | amplification         |
|    |            | IKBKE  | amplification         |
|    |            | MDM2   | amplification         |
|    |            | MDM4   | amplification         |
|    |            | ZNF217 | amplification         |
| 44 | liver      | PIK3CA | C407W                 |
|    |            | TP53   | F109_R110del          |
|    |            | FGF14  | amplification         |
|    |            | PRKDC  | R1136H                |
| 45 | liver      | AKT2   | amplification         |
|    |            | CCNE1  | amplification         |
|    |            | TP53   | R175H                 |
|    |            | CTNNB1 | A636fs*12             |
|    |            | MYST3  | amplification         |
| 46 | liver      | PIK3CA | amplification, H1047R |

|    |               |        |                         |
|----|---------------|--------|-------------------------|
|    |               | HRAS   | Q61K                    |
|    |               | KRAS   | Q61K                    |
|    |               | TP53   | G245D                   |
| 47 | liver         | FGFR2  | S252W                   |
|    |               | GNAS   | amplification           |
|    |               | PIK3CA | H1047R                  |
|    |               | AURKA  | amplification           |
|    |               | CCND1  | amplification           |
|    |               | TP53   | K132N                   |
|    |               | FGF19  | amplification           |
|    |               | FGF3   | amplification           |
|    |               | FGF4   | amplification           |
|    |               |        |                         |
| 48 | lung          | PIK3CA | amplification           |
|    |               | CCND3  | amplification           |
|    |               | IKBKE  | amplification           |
|    |               | TP53   | W91*                    |
|    |               | SOX2   | amplification           |
| 49 | breast        | CCND1  | amplification           |
|    |               | EMSY   | amplification           |
|    |               | FGF19  | amplification           |
|    |               | FGF3   | amplification           |
|    |               | FGF4   | amplification           |
| 50 | lymph node    | RPTOR  | amplification           |
|    |               | FGFR1  | amplification           |
|    |               | CCND1  | amplification           |
|    |               | MYC    | amplification           |
|    |               | EMSY   | amplification           |
|    |               | FGF19  | amplification           |
|    |               | FGF3   | amplification           |
|    |               | FGF4   | amplification           |
|    |               | MYST3  | amplification           |
|    |               | ZNF703 | amplification           |
| 51 | liver         | PTEN   | Loss exons 1,2          |
|    |               | FANCA  | rearrangement, intron 7 |
|    |               | MCL1   | amplification           |
|    |               | TP53   | C242fs*5                |
| 52 | head and neck | PIK3CA | E545Q, H1047R           |
|    |               | RUNX1  | R201Q                   |
|    |               | MAP3K1 | W560*                   |
| 53 | soft tissue   | CCND1  | amplification           |
|    |               | ESR1   | Y537C                   |
|    |               | FGF19  | amplification           |
|    |               | FGF3   | amplification           |
|    |               | FGF4   | amplification           |
| 54 | liver         | ERBB2  | amplification           |
|    |               | ERBB3  | amplification           |
|    |               | PTEN   | Q171*                   |

|    |            |        |                                         |
|----|------------|--------|-----------------------------------------|
|    |            | VHL    | F76L                                    |
|    |            | CCND3  | amplification                           |
|    |            | CDK12  | truncation exon 2                       |
|    |            | MYC    | amplification                           |
|    |            | TP53   | R65fs*58                                |
|    |            | MLL2   | E551*                                   |
|    |            | RB1    | loss exons 7-17                         |
| 55 | lung       | ATR    | F926fs*13                               |
|    |            | CCNE1  | amplification                           |
|    |            | TP53   | H179R                                   |
|    |            | ESR1   | D538G                                   |
|    |            | MAP2K4 | loss                                    |
|    |            | RB1    | splice site 2107-1G>T                   |
| 56 | liver      | PDGFRA | P567L                                   |
|    |            | IGF1R  | amplification                           |
|    |            | MYC    | amplification                           |
|    |            | TP53   | Y126*                                   |
|    |            | MAP2K4 | R287H                                   |
|    |            | MYST3  | amplification                           |
| 57 | liver      | CCND1  | amplification                           |
|    |            | FGFR1  | amplification                           |
|    |            | EMSY   | amplification                           |
|    |            | ESR1   | D538G                                   |
|    |            | FGF19  | amplification                           |
|    |            | FGF3   | amplification                           |
|    |            | FGF4   | amplification                           |
|    |            | MYST3  | amplification                           |
|    |            | ZNF703 | amplification                           |
| 58 | liver      | PIK3CA | Q546R                                   |
|    |            | CCND1  | amplification                           |
|    |            | FGF19  | amplification                           |
|    |            | FGF3   | amplification                           |
|    |            | FGF4   | amplification                           |
| 59 | lymph node | TP53   | G108fs*15                               |
|    |            | ETV6   | truncation intron 5 & dupl. introns 6-8 |
| 60 | abdomen    | PTEN   | C83fs*18                                |
|    |            | CCND1  | amplification                           |
|    |            | FGFR1  | amplification                           |
|    |            | MYC    | amplification                           |
|    |            | CDH1   | D587fs*2                                |
|    |            | EMSY   | amplification                           |
|    |            | ESR1   | D538G                                   |
|    |            | FGF19  | amplification                           |
|    |            | FGF3   | amplification                           |
|    |            | FGF4   | amplification                           |
|    |            | MYST3  | amplification                           |
|    |            | ZNF703 | amplification                           |



|        |               |        |                          |
|--------|---------------|--------|--------------------------|
| 61     | lymph node    | ATM    | E770*                    |
|        |               | CDKN2A | loss                     |
|        |               | CDKN2B | loss                     |
|        |               | ARFRP1 | amplification            |
|        |               | ESR1   | amplification            |
|        |               | GATA3  | H424fs*23+               |
|        |               | NFKBIA | amplification            |
|        |               | NKX2-1 | amplification            |
|        |               | RPTOR  | amplification            |
|        |               | ZNF217 | amplification            |
| 62     | liver         | BRAF   | G469A                    |
|        |               | PTEN   | loss                     |
|        |               | TP53   | R273C                    |
|        |               | ARID1A | Q878*                    |
| 63     | liver         | NF1    | splice site 205_247del42 |
|        |               | BRIP1  | N196S                    |
|        |               | GATA3  | A333FS*20                |
| 64     | skin          | PTEN   | T319fs*6                 |
|        |               | TP53   | P98fs*54                 |
|        |               | MYCL1  | amplification            |
|        |               | CCND1  | amplification            |
|        |               | JUN    | amplification            |
|        |               | FGF19  | amplification            |
|        |               | FGF3   | amplification            |
|        |               | FGF4   | amplification            |
|        |               | MLL2   | P1131L                   |
|        |               | 65     | soft tissue              |
| FGFR1  | amplification |        |                          |
| FGFR2  | P253R, Y375C  |        |                          |
| MITF   | V99I          |        |                          |
| MYC    | amplification |        |                          |
| MYST3  | amplification |        |                          |
| ZNF703 | amplification |        |                          |
| 66     | liver         | CCND1  | amplification            |
|        |               | MEN1   | I85fs*33                 |
|        |               | ESR1   | D538G                    |
|        |               | FGF19  | amplification            |
|        |               | FGF3   | amplification            |
|        |               | FGF4   | amplification            |
|        |               | GATA3  | H292fs*8                 |
| ZNF703 | amplification |        |                          |
| 67     | lymph node    | PALB2  | Q60fs*7, Y408fs*2        |
| 68     | lymph node    | PIK3CA | H1047L                   |
|        |               | RUNX1  | Q415fs*66+               |
|        |               | CDH1   | Q346*                    |
|        |               | ESR1   | D538G                    |
| 69     | skin          | PIK3CA | N345K                    |

|    |             |        |                  |
|----|-------------|--------|------------------|
|    |             | CCND1  | amplification    |
|    |             | ESR1   | Y537S            |
|    |             | FGF19  | amplification    |
|    |             | FGF3   | amplification    |
|    |             | FGF4   | amplification    |
|    |             | MSH2   | E529*            |
| 70 | breast      | PTEN   | C83fs*18         |
|    |             | CCND1  | amplification    |
|    |             | FGFR1  | amplification    |
|    |             | MYC    | amplification    |
|    |             | CDH1   | D587fs*2         |
|    |             | EMSY   | amplification    |
|    |             | ESR1   | D538G            |
|    |             | FGF19  | amplification    |
|    |             | FGF3   | amplification    |
|    |             | FGF4   | amplification    |
|    |             | MYST3  | amplification    |
|    |             | ZNF703 | amplification    |
| 71 | liver       | PIK3CA | *1069fs*1+       |
|    |             | CCND1  | amplification    |
|    |             | SRC    | amplification    |
|    |             | ATR    | ATR-XRCC4 fusion |
|    |             | AURKA  | amplification    |
|    |             | FGF19  | amplification    |
|    |             | FGF4   | amplification    |
|    |             | GNAS   | amplification    |
|    |             | MDM2   | amplification    |
|    |             | MYC    | amplification    |
|    |             | TOP1   | amplification    |
|    |             | ESR1   | D538G            |
|    |             | FGF3   | amplification    |
|    |             | ZNF217 | amplification    |
| 72 | soft tissue | PIK3CA | amplification    |
|    |             | CCND1  | amplification    |
|    |             | KDR    | amplification    |
|    |             | FGF19  | amplification    |
|    |             | IGF1R  | amplification    |
|    |             | NOTCH1 | L2457V           |
|    |             | SOX2   | amplification    |
|    |             | TP53   | P151R            |
|    |             | ARFRP1 | amplification    |
|    |             | ARID2  | E71*, S1491*     |
|    |             | EMSY   | amplification    |
|    |             | ESR1   | Y537C            |
|    |             | FGF3   | amplification    |
|    |             | FGF4   | amplification    |
|    |             | GATA3  | S411fs*29+       |

|    |         |        |                                      |
|----|---------|--------|--------------------------------------|
|    |         | MLL2   | rearrangement exon 35                |
|    |         | ZNF703 | amplification                        |
| 73 | skin    | PIK3CA | H1047R                               |
|    |         | CDH1   | R209fs*6                             |
|    |         | EMSY   | R840H                                |
|    |         | MAP3K1 | Q1220*, splice site 2370-2_2381del14 |
|    |         |        |                                      |
| 74 | unknown | PIK3CA | amplification, E542K                 |
|    |         | MYC    | amplification                        |
|    |         | TP53   | P151R                                |
| 75 | ovary   | AUKRA  | amplification                        |
|    |         | GATA3  | P409fs*38+                           |
|    |         | ZNF217 | amplification                        |
